# Supplementary material for: Au nanoparticle-functionalised WO3nanoneedles and their application in high sensitivity gas sensor devices
Source: Royal Society of Chemistry journal article supplement (doi:10.1039/c0cc02398a), 2010-11-20
Supplement: c0cc02398a.pdf [file c0cc02398a.pdf]

## Au nanoparticle-functionalised WO<sub>3</sub> nanoneedles and their application in high sensitivity gas sensor devices

Stella Vallejos<sup>a</sup>, Toni Stoycheva<sup>a</sup>, Polona Umek<sup>c</sup>, Cristina Navio<sup>d</sup>, Rony Snyders<sup>d</sup>, Carla Bittencourt<sup>d</sup>, Eduard Llobet<sup>a</sup>, Christopher Blackman<sup>\*b</sup> Xavier Correig<sup>a</sup>

Received (in XXX, XXX) Xth XXXXXXXXXX 200X, Accepted Xth XXXXXXXXXX 200X

First published on the web Xth XXXXXXXXXX 200X

DOI: 10.1039/b000000x

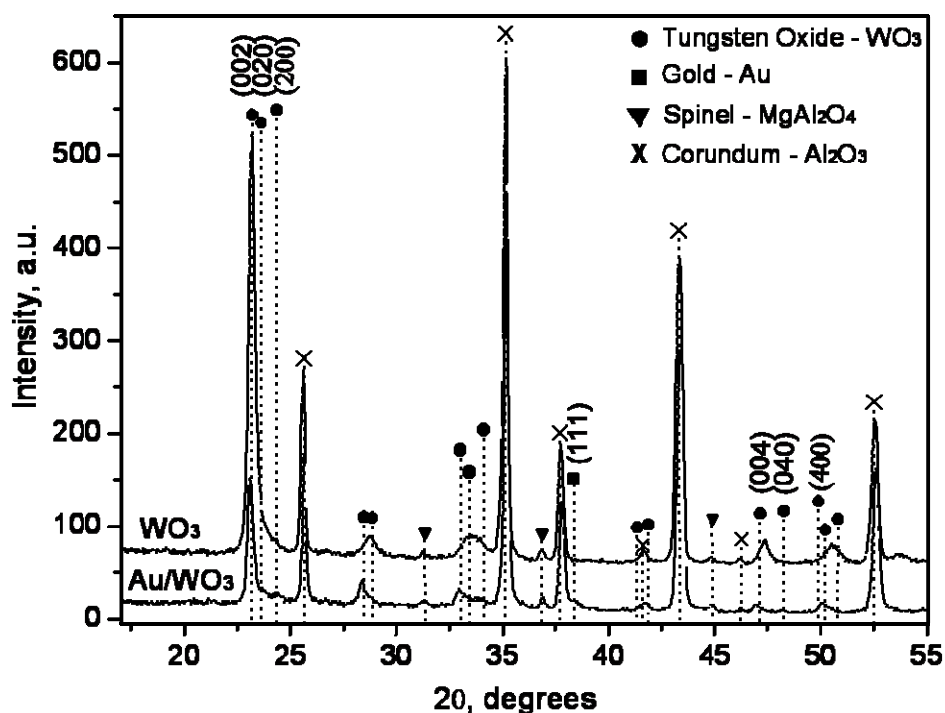

**Fig. 1** XRD pattern of NP Au/WO<sub>3</sub> NN deposited *via* AACVD compared with non-functionalised WO<sub>3</sub> NN.<sup>19</sup>

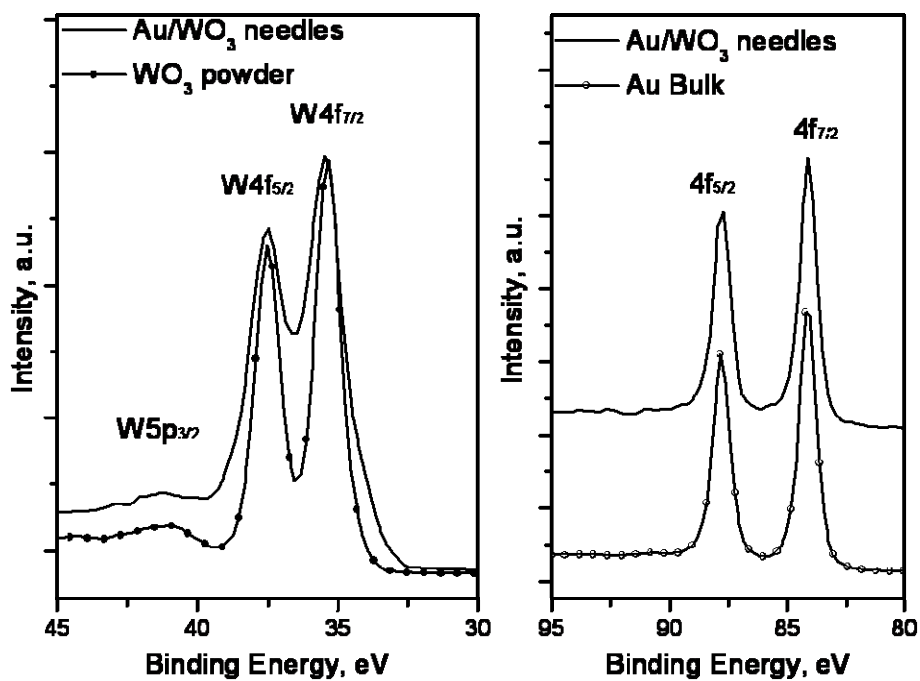

**Fig. 2** XPS spectra of NP Au/WO<sub>3</sub> NN sample; a) W 4f region, compared to a thin film WO<sub>3</sub> standard and b) Au 4f region, compared to a gold standard.
